# Supplementary material
Source: PubMed Central journal article supplement (PMC4187624)
Supplement: EC.00135-14_zek999094335so1.pdf [file EC.00135-14_zek999094335so1.pdf]

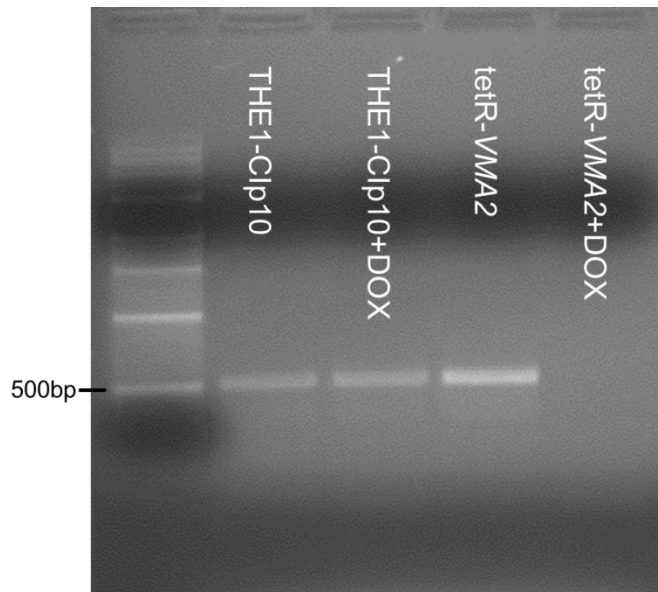

**Supplemental Figure 1.** RT-PCR analysis of *VMA2* expression after 24hr treatment with DOX. mRNA was extracted from THE1-CIp10 and tetR-*VMA2* cells after 24h incubation in unbuffered YPD  $\pm$  DOX. Reverse transcriptase PCR (RT-PCR) was used to amplify the 523bp *VMA2* transcript using primers RT-*VMA2*-5Det and RT-*VMA2*-3Det. After 24 hours of treatment with DOX, the *VMA2* gene is completely repressed. Without DOX, the tetR-*VMA2* strain exhibits slightly elevated levels of *VMA2* transcript, as previously observed with other genes when placed under the tetR promoter (1).

1. Nakayama H, Mio T, Nagahashi S, Kokado M, Arisawa M, Aoki Y. 2000. Tetracycline-regulatable system to tightly control gene expression in the pathogenic fungus *Candida albicans*. *Infect. Immun.* 68:6712–6719.
